# Supplementary material for: Longer-term efficiency and safety of increasing the frequency of whole blood donation (INTERVAL): extension study of a randomised trial of 20 757 blood donors
Source: PubMed Central journal article supplement (PMC7029279; doi:10.1016/s2352-3026(19)30106-1), 2019-08-02
Supplement: mmc1.pdf [file mmc1.pdf]

# THE LANCET

## Haematology

### Supplementary appendix

This appendix formed part of the original submission and has been peer reviewed. We post it as supplied by the authors.

Supplement to: Kaptoge S, Angelantonio ED, Moore C, et al. Longer-term efficiency and safety of increasing the frequency of whole blood donation (INTERVAL): extension study of a randomised trial of 20 757 blood donors. *Lancet Haematol* 2019; published online Aug 2. [http://dx.doi.org/10.1016/S2352-3026\(19\)30106-1](http://dx.doi.org/10.1016/S2352-3026(19)30106-1).

## **Supplementary Material**

**Longer-term safety and efficiency of varying the frequency of whole blood donation (INTERVAL): extension of a randomised trial in 20,757 blood donors**

|                                                                                                                                                                                                                                                          |    |
|----------------------------------------------------------------------------------------------------------------------------------------------------------------------------------------------------------------------------------------------------------|----|
| <b>eTable 1.</b> Baseline characteristics by sex among those invited in the extension study. ....                                                                                                                                                        | 3  |
| <b>eTable 2.</b> Symptoms and other haematological markers during main trial by sex among those invited in the extension study. ....                                                                                                                     | 4  |
| <b>eTable 3.</b> Baseline characteristics by sex and inter-donation intervals among those in the extension study. ....                                                                                                                                   | 5  |
| <b>eTable 4.</b> Haematological markers at end of main trial by sex and inter-donation intervals among those in the extension study. ....                                                                                                                | 6  |
| <b>eTable 5.</b> Reported symptoms during the main trial by sex and inter-donation intervals among those in the extension study. ....                                                                                                                    | 7  |
| <b>eTable 6.</b> Baseline characteristics by sex and reminder approaches in the extension study. ...                                                                                                                                                     | 8  |
| <b>eTable 7.</b> Blood donations and other outcomes during the extension study by and reminder approaches. ....                                                                                                                                          | 9  |
| <b>eTable 8.</b> Reported symptoms during the extension study by inter-donation intervals. ....                                                                                                                                                          | 10 |
| <b>eTable 9.</b> Haematological markers at end of extension study by inter-donation intervals. ....                                                                                                                                                      | 11 |
|                                                                                                                                                                                                                                                          |    |
| <b>eFigure 1.</b> Extended CONSORT flow chart: recruitment, participation, and completeness of main outcomes in the extension study. ....                                                                                                                | 12 |
| <b>eFigure 2.</b> Whole blood donation rates during the extension study by sex and reminder approaches. ....                                                                                                                                             | 13 |
| <b>eFigure 3.</b> Reported symptoms by sex and inter-donation intervals among participants in the extension study. ....                                                                                                                                  | 14 |
| <b>eFigure 4.</b> Low haemoglobin deferral rates by sex and inter-donation intervals among participants in the extension study. ....                                                                                                                     | 15 |
| <b>eFigure 5.</b> Haemoglobin concentrations below regulatory thresholds (a), and ferritin concentrations <15 µg/L (b), by sex and inter-donation intervals at the end of the extension study, end of the main trial period, and at baseline. ....       | 16 |
| <b>eFigure 6.</b> Trends in standardized haematological characteristics by inter-donation intervals restricted to participants with ferritin measured at the end of the extension study. ....                                                            | 17 |
| <b>eFigure 7.</b> Trends in reported use of iron supplements by inter-donation intervals among participants in the extension study. ....                                                                                                                 | 18 |
| <b>eFigure 8.</b> Haemoglobin concentrations by inter-donation intervals, stratified according to reported use of any iron supplements during the main trial or during the extension study, among participants in the extension study. ....              | 19 |
| <b>eFigure 9.</b> Ferritin concentrations by inter-donation intervals, stratified according to reported use of any iron supplements during the main trial or during the extension study among participants in the extension study. ....                  | 20 |
| <b>eFigure 10.</b> Reticulocyte haemoglobin concentrations by inter-donation intervals, stratified according to reported use of any iron supplements during the main trial or during the extension study among participants in the extension study. .... | 21 |
|                                                                                                                                                                                                                                                          |    |
| <b>eAppendix.</b> Extension study invitations, contributing data, and protocols for appointment reminders. ....                                                                                                                                          | 22 |

**eTable 1.** Baseline characteristics by sex among those invited in the extension study.

| Characteristics                                                         | Men (N = 18754 invited) |                  |                      | Women (N = 19281 invited) |                  |                      |
|-------------------------------------------------------------------------|-------------------------|------------------|----------------------|---------------------------|------------------|----------------------|
|                                                                         | In extension            | Not in extension | P-value <sup>6</sup> | In extension              | Not in extension | P-value <sup>6</sup> |
| No (% out of total invited) <sup>1</sup>                                | 10843 (58%)             | 7911 (42%)       |                      | 9914 (51%)                | 9367 (49%)       |                      |
| <b>At beginning of main trial</b>                                       |                         |                  |                      |                           |                  |                      |
| Age (years)                                                             | 48.1 (13.2)             | 41.5 (14.2)      | <0.0001              | 45.2 (13.4)               | 37.6 (13.4)      | <0.0001              |
| Weight (kg)                                                             | 85.3 (14.2)             | 84.7 (14.9)      | 0.008                | 71.6 (14.4)               | 71.8 (15.2)      | 0.458                |
| New donor <sup>2</sup>                                                  | 497 (4.6%)              | 888 (11.2%)      | <0.0001              | 689 (6.9%)                | 1236 (13.2%)     | <0.0001              |
| Blood donation rate in previous 2 years (times/yr)                      | 2.17 (0.87)             | 1.94 (0.95)      | <0.0001              | 1.82 (0.82)               | 1.61 (0.87)      | <0.0001              |
| Deferral for low Hb per attendance in previous 2 years (%) <sup>3</sup> | 490 (1.03%)             | 305 (1.08%)      | 0.548                | 1255 (3.34%)              | 1121 (3.90%)     | 0.001                |
| SF-36 Physical wellbeing score                                          | 56.8 (4.3)              | 56.9 (4.8)       | 0.715                | 57.1 (4.4)                | 57.0 (4.9)       | 0.365                |
| SF-36 Mental wellbeing score <sup>7</sup>                               | 55.1 (5.5)              | 53.9 (6.6)       | <0.0001              | 54.0 (6.1)                | 53.0 (7.0)       | <0.0001              |
| Haemoglobin (g/L)                                                       | 149.5 (9.7)             | 149.7 (10.1)     | 0.138                | 134.3 (8.9)               | 133.5 (9.5)      | <0.0001              |
| Haemoglobin <135 g/L (men) or <125 g/L (women) (%) <sup>4</sup>         | 326 (3.9%)              | 171 (5.2%)       | 0.005                | 769 (10.7%)               | 430 (13.0%)      | 0.001                |
| Ferritin (µg/L) <sup>5</sup>                                            | 44.0 (27.0-73.0)        | 45.6 (28.0-80.0) | 0.007                | 26.0 (16.0-45.0)          | 23.2 (13.0-42.0) | <0.0001              |
| Ferritin <15 µg/L (%) <sup>4</sup>                                      | 538 (6.8%)              | 300 (9.5%)       | <0.0001              | 1367 (19.9%)              | 828 (26.2%)      | <0.0001              |
| <b>During main trial</b>                                                |                         |                  |                      |                           |                  |                      |
| Blood donation rate (times/yr)                                          | 3.95 (1.10)             | 2.27 (1.57)      | <0.0001              | 2.68 (0.81)               | 1.43 (1.10)      | <0.0001              |
| Deferral for low Hb per attendance (%) <sup>3</sup>                     | 3380 (3.62%)            | 2138 (5.25%)     | <0.0001              | 3333 (5.49%)              | 2764 (8.41%)     | <0.0001              |
| Deferral for other reasons per attendance (%) <sup>3</sup>              | 3536 (3.79%)            | 2355 (5.78%)     | <0.0001              | 3371 (5.56%)              | 2858 (8.69%)     | <0.0001              |
| Fainting at donation session per attendance (%) <sup>3</sup>            | 204 (0.22%)             | 179 (0.44%)      | <0.0001              | 362 (0.60%)               | 318 (0.97%)      | <0.0001              |
| <b>At end of main trial (ie, beginning of the extension study)</b>      |                         |                  |                      |                           |                  |                      |
| SF-36 Physical wellbeing score <sup>7</sup>                             | 56.7 (4.8)              | 56.1 (5.7)       | <0.0001              | 56.7 (5.2)                | 55.8 (6.3)       | <0.0001              |
| SF-36 Mental wellbeing score <sup>7</sup>                               | 54.3 (6.4)              | 52.9 (7.6)       | <0.0001              | 53.1 (7.2)                | 51.6 (8.2)       | <0.0001              |
| Haemoglobin (g/L)                                                       | 144.2 (11.6)            | 146.0 (12.1)     | <0.0001              | 131.3 (11.2)              | 131.8 (11.7)     | 0.035                |
| Haemoglobin <135 g/L (men) or <125 g/L (women) (%) <sup>4</sup>         | 1156 (13.7%)            | 363 (10.9%)      | <0.0001              | 1246 (17.0%)              | 572 (17.1%)      | 0.974                |
| Ferritin (µg/L) <sup>5</sup>                                            | 28.9 (17.0-52.0)        | 36.7 (20.0-69.0) | <0.0001              | 23.0 (13.0-43.0)          | 24.7 (14.0-49.0) | <0.0001              |
| Ferritin <15 µg/L (%) <sup>4</sup>                                      | 1354 (17.5%)            | 455 (14.6%)      | <0.0001              | 1664 (24.7%)              | 721 (23.1%)      | 0.082                |
| Completed questionnaire                                                 | 10287 (94.9%)           | 3552 (44.9%)     | <0.0001              | 9322 (94.0%)              | 3913 (41.8%)     | <0.0001              |
| Gave blood sample                                                       | 10605 (97.8%)           | 4049 (51.2%)     | <0.0001              | 9614 (97.0%)              | 4350 (46.4%)     | <0.0001              |

Data presented are mean (standard deviation) or number of participants (%) unless otherwise stated.

<sup>1</sup> Additional missing data: None for age, weight, or donation history; SF-36 Physical/Mental wellbeing scores (0.7% baseline, 29.8% end of main trial), haemoglobin (1.9% baseline, 24.8% end of main trial), ferritin (6.4% baseline, 30.6% end of main trial).

<sup>2</sup> A participant who has not previously provided a full blood donation.

<sup>3</sup> Total number (%) of deferrals or faints out of all attendances within 2-year period.

<sup>4</sup> Amongst those donating blood at baseline or end of main trial.

<sup>5</sup> Values are geometric means and interquartile ranges.

<sup>6</sup> P-values are for group differences, from unadjusted analyses.

**eTable 2.** Symptoms and other haematological markers during main trial by sex among those invited in the extension study.

| Characteristics                                                    | Men (N = 18754 invited) |                      |                      | Women (N = 19281 invited) |                      |                      |
|--------------------------------------------------------------------|-------------------------|----------------------|----------------------|---------------------------|----------------------|----------------------|
|                                                                    | In extension            | Not in extension     | P-value <sup>2</sup> | In extension              | Not in extension     | P-value <sup>2</sup> |
| No (% out of total invited) <sup>1</sup>                           | 10843 (58%)             | 7911 (42%)           |                      | 9914 (51%)                | 9367 (49%)           |                      |
| <b>Reported 6-monthly during main trial</b>                        |                         |                      |                      |                           |                      |                      |
| Fainting or feeling faint (%)                                      | 3.71 (3.48, 3.95)       | 6.67 (6.19, 7.16)    | <0.0001              | 6.87 (6.54, 7.21)         | 11.50 (10.92, 12.07) | <0.0001              |
| More tired than usual (%)                                          | 14.49 (14.01, 14.96)    | 21.81 (20.97, 22.64) | <0.0001              | 19.08 (18.53, 19.64)      | 28.28 (27.46, 29.11) | <0.0001              |
| More breathless than usual (%)                                     | 4.39 (4.13, 4.66)       | 8.02 (7.48, 8.56)    | <0.0001              | 5.68 (5.37, 5.99)         | 8.79 (8.29, 9.29)    | <0.0001              |
| Palpitations (%)                                                   | 3.95 (3.69, 4.22)       | 6.44 (5.93, 6.94)    | <0.0001              | 7.93 (7.54, 8.33)         | 11.34 (10.73, 11.95) | <0.0001              |
| Dizziness (%)                                                      | 5.72 (5.42, 6.02)       | 8.67 (8.12, 9.22)    | <0.0001              | 10.48 (10.05, 10.91)      | 15.32 (14.66, 15.98) | <0.0001              |
| Chest pain (%)                                                     | 2.06 (1.89, 2.23)       | 3.84 (3.47, 4.21)    | <0.0001              | 2.14 (1.94, 2.33)         | 3.48 (3.16, 3.81)    | <0.0001              |
| Restless legs (%)                                                  | 11.19 (10.71, 11.66)    | 13.37 (12.66, 14.08) | <0.0001              | 17.15 (16.54, 17.77)      | 17.96 (17.21, 18.71) | 0.105                |
| Doctor diagnosed low iron levels (%)                               | 2.91 (2.70, 3.11)       | 6.53 (6.05, 7.00)    | <0.0001              | 4.12 (3.87, 4.37)         | 8.30 (7.81, 8.78)    | <0.0001              |
| Doctor prescribed iron supplements (%)                             | 1.50 (1.35, 1.65)       | 3.73 (3.37, 4.09)    | <0.0001              | 2.71 (2.50, 2.92)         | 5.77 (5.36, 6.18)    | <0.0001              |
| <b>Reported over 2 years during main trial</b>                     |                         |                      |                      |                           |                      |                      |
| Any iron supplements use (%)                                       | 13.26 (12.61, 13.92)    | 17.13 (15.91, 18.35) | <0.0001              | 19.73 (18.92, 20.53)      | 23.15 (21.84, 24.47) | <0.0001              |
| Pica (%)                                                           | 0.65 (0.50, 0.81)       | 1.53 (1.12, 1.95)    | <0.0001              | 1.61 (1.35, 1.86)         | 1.87 (1.43, 2.30)    | 0.310                |
| <b>At end of main trial (ie, beginning of the extension study)</b> |                         |                      |                      |                           |                      |                      |
| Red blood cell count, RBC (x10 <sup>12</sup> /L)                   | 5.02 (0.41)             | 5.04 (0.42)          | 0.004                | 4.58 (0.40)               | 4.58 (0.40)          | 0.902                |
| Haematocrit, HCT (%)                                               | 45.4 (3.4)              | 45.7 (3.5)           | <0.0001              | 42.0 (3.4)                | 42.1 (3.5)           | 0.658                |
| Mean corpuscular volume, MCV (fL)                                  | 90.6 (5.3)              | 90.8 (5.5)           | 0.086                | 91.9 (5.4)                | 91.9 (5.8)           | 0.998                |
| Mean corpuscular haemoglobin, MCH (pg)                             | 28.8 (2.2)              | 29.0 (2.2)           | <0.0001              | 28.8 (2.3)                | 28.8 (2.3)           | 0.038                |
| Mean corpuscular Hb concentration, MCHC (g/dL)                     | 31.8 (1.3)              | 31.9 (1.3)           | <0.0001              | 31.3 (1.4)                | 31.3 (1.2)           | 0.238                |
| Reticulocyte Hb equivalent, RET-He (pg)                            | 31.9 (2.3)              | 32.0 (2.4)           | 0.018                | 31.6 (2.3)                | 31.5 (2.5)           | 0.009                |
| Platelet count, PLT (x10 <sup>9</sup> /L)                          | 235 (54)                | 238 (52)             | 0.003                | 270 (61)                  | 272 (62)             | 0.014                |
| White blood cell count, WBC (x10 <sup>9</sup> /L)                  | 6.06 (1.48)             | 6.18 (1.55)          | <0.0001              | 6.59 (2.74)               | 6.85 (1.77)          | <0.0001              |
| Neutrophil count, NEUT# (x10 <sup>9</sup> /L)                      | 3.47 (1.13)             | 3.57 (1.20)          | <0.0001              | 3.81 (2.26)               | 4.01 (1.38)          | <0.0001              |

Data presented are percentage (95% CI) reported over all 6-monthly questionnaires for symptoms (over 2-years for pica), and mean (standard deviation) for haematological markers.

<sup>1</sup> Additional missing data: 11.0% for symptoms (29.8 for any iron supplement use, 30.6% for pica), and 24.8% for haematological markers.

<sup>2</sup> P-values are for group differences, from unadjusted analyses.

**eTable 3.** Baseline characteristics by sex and inter-donation intervals among those in the extension study.

| Characteristics                                                    | Men (N = 10843 in extension) |                  |                  |                      | Women (N = 9914 in extension) |                  |                  |                      |
|--------------------------------------------------------------------|------------------------------|------------------|------------------|----------------------|-------------------------------|------------------|------------------|----------------------|
|                                                                    | 8 weeks                      | 10 weeks         | 12 weeks         | P-value <sup>6</sup> | 12 weeks                      | 14 weeks         | 16 weeks         | P-value <sup>6</sup> |
| No (% out of total in extension) <sup>1</sup>                      | 3554 (33%)                   | 3695 (34%)       | 3594 (33%)       | -                    | 3369 (34%)                    | 3309 (33%)       | 3236 (33%)       | -                    |
| <b>At beginning of main trial</b>                                  |                              |                  |                  |                      |                               |                  |                  |                      |
| Age (years)                                                        | 47.6 (13.3)                  | 48.3 (13.3)      | 48.5 (13.1)      | 0.002                | 45.1 (13.5)                   | 45.3 (13.4)      | 45.4 (13.4)      | 0.252                |
| Weight (kg)                                                        | 85.6 (14.2)                  | 85.3 (14.3)      | 84.9 (13.9)      | 0.023                | 71.6 (14.1)                   | 71.6 (14.6)      | 71.6 (14.5)      | 0.896                |
| New donor <sup>2</sup>                                             | 170 (4.8%)                   | 171 (4.6%)       | 156 (4.3%)       | 0.370                | 231 (6.9%)                    | 216 (6.5%)       | 242 (7.5%)       | 0.334                |
| Blood donation rate in previous 2 years (times/yr)                 | 2.17 (0.88)                  | 2.19 (0.86)      | 2.16 (0.86)      | 0.548                | 1.82 (0.82)                   | 1.83 (0.81)      | 1.81 (0.82)      | 0.408                |
| Deferral for low Hb in previous 2 years (%) <sup>3</sup>           | 157 (1.01%)                  | 170 (1.04%)      | 163 (1.03%)      | 0.857                | 425 (3.3%)                    | 404 (3.21%)      | 426 (3.53%)      | 0.389                |
| SF-36 Physical wellbeing score                                     | 56.8 (4.4)                   | 56.9 (4.2)       | 56.8 (4.3)       | 0.702                | 57.1 (4.4)                    | 57.0 (4.5)       | 57.1 (4.4)       | 0.583                |
| SF-36 Mental wellbeing score                                       | 55.2 (5.4)                   | 55.1 (5.5)       | 55.0 (5.6)       | 0.079                | 54.1 (6.2)                    | 54.0 (6.2)       | 54.1 (6.0)       | 0.982                |
| Haemoglobin (g/L)                                                  | 149.8 (9.8)                  | 149.4 (9.7)      | 149.3 (9.5)      | 0.042                | 134.5 (9.0)                   | 134.3 (8.6)      | 134.2 (9.0)      | 0.194                |
| Haemoglobin <135 g/L (men) or <125 g/L (women) (%) <sup>4</sup>    | 96 (3.7%)                    | 117 (4.1%)       | 113 (3.9%)       | 0.746                | 232 (9.7%)                    | 267 (11.1%)      | 270 (11.2%)      | 0.107                |
| Ferritin (µg/L) <sup>5</sup>                                       | 45.2 (27.3-75.0)             | 43.6 (27.0-73.0) | 43.3 (27.0-71.0) | 0.024                | 26.6 (16.0-47.0)              | 25.7 (16.0-45.0) | 25.8 (16.0-45.0) | 0.113                |
| Ferritin <15 µg/L (%) <sup>4</sup>                                 | 155 (6.3%)                   | 198 (7.3%)       | 185 (6.7%)       | 0.539                | 419 (18.5%)                   | 476 (20.7%)      | 472 (20.5%)      | 0.084                |
| <b>During main trial</b>                                           |                              |                  |                  |                      |                               |                  |                  |                      |
| Blood donation rate (times/yr)                                     | 4.54 (1.24)                  | 3.94 (0.94)      | 3.38 (0.72)      | <0.0001              | 2.97 (0.91)                   | 2.68 (0.77)      | 2.40 (0.62)      | <0.0001              |
| Deferral for low Hb per attendance (%) <sup>3</sup>                | 1814 (5.08%)                 | 974 (3.09%)      | 592 (2.27%)      | <0.0001              | 1501 (6.53%)                  | 1094 (5.42%)     | 738 (4.22%)      | <0.0001              |
| Deferral for other reasons per attendance (%) <sup>3</sup>         | 1339 (3.75%)                 | 1190 (3.77%)     | 1007 (3.86%)     | 0.513                | 1219 (5.3%)                   | 1138 (5.63%)     | 1014 (5.8%)      | 0.032                |
| Fainting at donation session per attendance (%) <sup>3</sup>       | 67 (0.19%)                   | 68 (0.22%)       | 69 (0.26%)       | 0.099                | 122 (0.53%)                   | 113 (0.56%)      | 127 (0.73%)      | 0.033                |
| <b>At end of main trial (ie, beginning of the extension study)</b> |                              |                  |                  |                      |                               |                  |                  |                      |
| SF-36 Physical wellbeing score                                     | 56.8 (4.9)                   | 56.8 (4.7)       | 56.7 (4.9)       | 0.351                | 56.8 (5.1)                    | 56.7 (5.2)       | 56.6 (5.4)       | 0.092                |
| SF-36 Mental wellbeing score                                       | 54.4 (6.5)                   | 54.3 (6.3)       | 54.2 (6.6)       | 0.212                | 53.0 (7.2)                    | 53.1 (7.1)       | 53.0 (7.3)       | 0.910                |
| Haemoglobin (g/L)                                                  | 14.26 (1.18)                 | 14.43 (1.13)     | 14.57 (1.13)     | <0.0001              | 13.06 (1.13)                  | 13.14 (1.13)     | 13.20 (1.11)     | <0.0001              |
| Haemoglobin <135 g/L (men) or <125 g/L (women) (%) <sup>4</sup>    | 452 (17.4%)                  | 391 (13.6%)      | 313 (10.7%)      | <0.0001              | 460 (19.0%)                   | 430 (17.6%)      | 356 (14.5%)      | <0.0001              |
| Ferritin (µg/L) <sup>5</sup>                                       | 24.5 (14.0-43.0)             | 28.8 (17.0-51.0) | 34.0 (21.0-59.0) | <0.0001              | 21.1 (12.0-39.0)              | 22.9 (13.0-41.0) | 25.4 (14.0-47.0) | <0.0001              |
| Ferritin <15 µg/L (%) <sup>4</sup>                                 | 564 (23.6%)                  | 467 (17.7%)      | 323 (11.9%)      | <0.0001              | 597 (26.8%)                   | 577 (25.6%)      | 490 (21.8%)      | <0.0001              |
| Completed questionnaire                                            | 3373 (94.9%)                 | 3503 (94.8%)     | 3411 (94.9%)     | 0.998                | 3155 (93.6%)                  | 3128 (94.5%)     | 3039 (93.9%)     | 0.645                |
| Gave blood sample                                                  | 3463 (97.4%)                 | 3608 (97.6%)     | 3519 (97.9%)     | 0.270                | 3260 (96.8%)                  | 3199 (96.7%)     | 3142 (97.1%)     | 0.483                |

Data presented are mean (standard deviation) or number of participants (%) unless otherwise stated.

<sup>1</sup> Additional missing data: None for age, weight, or donation history; SF-36 Physical/Mental wellbeing scores (0.4% baseline, 6.4% end of main trial), haemoglobin (1.8% baseline, 2.6% end of main trial), ferritin (6.4% baseline, 10.5% end of main trial).

<sup>2</sup> A participant who has not previously provided a full blood donation.

<sup>3</sup> Total number (%) of deferrals or faints out of all attendances within 2-year period.

<sup>4</sup> Amongst those donating blood at baseline or end of main trial.

<sup>5</sup> Values are geometric means and interquartile ranges

<sup>6</sup> P-values are for linear trend across groups, from unadjusted analyses.

**eTable 4.** Haematological markers at end of main trial by sex and inter-donation intervals among those in the extension study.

| Outcomes                                          | Men (N = 10843 in extension) |                      |                      |                      | Women (N = 9914 in extension) |                      |                      |                      |
|---------------------------------------------------|------------------------------|----------------------|----------------------|----------------------|-------------------------------|----------------------|----------------------|----------------------|
|                                                   | 8 weeks                      | 10 weeks             | 12 weeks             | P-value <sup>2</sup> | 12 weeks                      | 14 weeks             | 16 weeks             | P-value <sup>2</sup> |
| No (% out of total in extension) <sup>1</sup>     | 3554 (33%)                   | 3695 (34%)           | 3594 (33%)           | -                    | 3369 (34%)                    | 3309 (33%)           | 3236 (33%)           | -                    |
| Red blood cell count, RBC (x10 <sup>12</sup> /L)  | 5.03<br>(5.02, 5.04)         | 5.03<br>(5.01, 5.04) | 5.01<br>(5.00, 5.03) | 0.842                | 4.57<br>(4.55, 4.58)          | 4.58<br>(4.57, 4.60) | 4.59<br>(4.58, 4.60) | 0.015                |
| Haematocrit, HCT (%)                              | 45.1<br>(45.0, 45.2)         | 45.4<br>(45.3, 45.5) | 45.7<br>(45.6, 45.8) | <0.0001              | 41.8<br>(41.7, 42.0)          | 42.1<br>(41.9, 42.2) | 42.2<br>(42.1, 42.3) | <0.0001              |
| Mean corpuscular volume , MCV (fL)                | 89.9<br>(89.7, 90.1)         | 90.6<br>(90.4, 90.8) | 91.3<br>(91.2, 91.5) | <0.0001              | 91.8<br>(91.6, 92.0)          | 91.9<br>(91.7, 92.1) | 92.0<br>(91.9, 92.2) | 0.005                |
| Mean corpuscular haemoglobin, MCH (pg)            | 28.4<br>(28.4, 28.5)         | 28.8<br>(28.7, 28.9) | 29.2<br>(29.1, 29.2) | <0.0001              | 28.7<br>(28.6, 28.8)          | 28.8<br>(28.7, 28.8) | 28.9<br>(28.8, 28.9) | <0.0001              |
| Mean corpuscular Hb concentration, MCHC (g/dL)    | 31.6<br>(31.6, 31.7)         | 31.8<br>(31.7, 31.8) | 31.9<br>(31.9, 32.0) | <0.0001              | 31.3<br>(31.2, 31.3)          | 31.3<br>(31.3, 31.3) | 31.4<br>(31.3, 31.4) | 0.001                |
| Reticulocyte Hb equivalent, RET-He (pg)           | 31.5<br>(31.4, 31.6)         | 31.9<br>(31.8, 32.0) | 32.3<br>(32.2, 32.3) | <0.0001              | 31.5<br>(31.4, 31.6)          | 31.6<br>(31.5, 31.7) | 31.7<br>(31.6, 31.8) | <0.0001              |
| Platelet count, PLT (x10 <sup>9</sup> /L)         | 237<br>(235, 239)            | 236<br>(234, 238)    | 233<br>(231, 235)    | <0.0001              | 270<br>(268, 272)             | 269<br>(267, 271)    | 269<br>(267, 271)    | 0.002                |
| White blood cell count, WBC (x10 <sup>9</sup> /L) | 6.09<br>(6.05, 6.14)         | 6.06<br>(6.02, 6.11) | 6.03<br>(5.99, 6.08) | 0.778                | 6.56<br>(6.50, 6.62)          | 6.55<br>(6.49, 6.61) | 6.65<br>(6.51, 6.80) | 0.185                |
| Neutrophil count, NEUT# (x10 <sup>9</sup> /L)     | 3.49<br>(3.45, 3.52)         | 3.48<br>(3.44, 3.51) | 3.45<br>(3.41, 3.48) | 0.805                | 3.80<br>(3.75, 3.84)          | 3.79<br>(3.75, 3.83) | 3.85<br>(3.73, 3.97) | 0.293                |

Data presented are mean or percentage (95% CI) unless otherwise stated.

<sup>1</sup> Additional missing data at the end of main trial were 2.7% for each of the haematological markers.

<sup>2</sup> P-values are for linear trend across groups, from analyses adjusted for baseline characteristics (centre, age, weight, new donor status) and value of the outcome at baseline (where available).

**eTable 5.** Reported symptoms during the main trial by sex and inter-donation intervals among those in the extension study.

| Outcomes                                      | Men (N = 10843 in extension) |                         |                         |                      | Women (N = 9914 in extension) |                         |                         |                      |
|-----------------------------------------------|------------------------------|-------------------------|-------------------------|----------------------|-------------------------------|-------------------------|-------------------------|----------------------|
|                                               | 8 weeks                      | 10 weeks                | 12 weeks                | P-value <sup>3</sup> | 12 weeks                      | 14 weeks                | 16 weeks                | P-value <sup>3</sup> |
| No (% out of total in extension) <sup>1</sup> | 3554 (33%)                   | 3695 (34%)              | 3594 (33%)              | -                    | 3369 (34%)                    | 3309 (33%)              | 3236 (33%)              | -                    |
| <b>Reported 6-monthly<sup>2</sup></b>         |                              |                         |                         |                      |                               |                         |                         |                      |
| Fainting or feeling faint (%)                 | 4.15<br>(3.71, 4.59)         | 3.54<br>(3.15, 3.93)    | 3.58<br>(3.17, 3.98)    | 0.063                | 7.01<br>(6.44, 7.59)          | 6.95<br>(6.36, 7.54)    | 6.84<br>(6.24, 7.44)    | 0.732                |
| More tired than usual (%)                     | 15.96<br>(15.09, 16.83)      | 13.65<br>(12.87, 14.44) | 14.09<br>(13.27, 14.90) | 0.003                | 20.49<br>(19.51, 21.47)       | 18.09<br>(17.16, 19.03) | 18.94<br>(17.98, 19.91) | 0.031                |
| More breathless than usual (%)                | 5.07<br>(4.58, 5.56)         | 4.03<br>(3.61, 4.46)    | 4.19<br>(3.74, 4.64)    | 0.011                | 5.97<br>(5.42, 6.51)          | 5.46<br>(4.95, 5.98)    | 5.71<br>(5.17, 6.26)    | 0.475                |
| Palpitations (%)                              | 4.27<br>(3.79, 4.75)         | 4.07<br>(3.60, 4.55)    | 3.62<br>(3.19, 4.06)    | 0.075                | 8.30<br>(7.60, 9.00)          | 7.35<br>(6.70, 8.00)    | 8.43<br>(7.71, 9.15)    | 0.735                |
| Dizziness (%)                                 | 6.34<br>(5.77, 6.90)         | 5.50<br>(5.00, 6.00)    | 5.53<br>(5.02, 6.04)    | 0.032                | 10.63<br>(9.90, 11.36)        | 10.50<br>(9.75, 11.25)  | 10.70<br>(9.92, 11.48)  | 0.835                |
| Chest pain (%)                                | 2.29<br>(1.97, 2.61)         | 2.00<br>(1.71, 2.30)    | 1.95<br>(1.66, 2.24)    | 0.166                | 2.01<br>(1.70, 2.33)          | 2.24<br>(1.90, 2.58)    | 2.24<br>(1.88, 2.60)    | 0.307                |
| Restless legs (%)                             | 11.86<br>(11.01, 12.70)      | 11.35<br>(10.52, 12.17) | 10.67<br>(9.86, 11.48)  | 0.025                | 17.47<br>(16.40, 18.53)       | 17.01<br>(15.94, 18.07) | 17.58<br>(16.50, 18.67) | 0.964                |
| Doctor diagnosed low iron levels (%)          | 4.31<br>(3.88, 4.75)         | 2.62<br>(2.28, 2.95)    | 1.96<br>(1.66, 2.26)    | <0.0001              | 4.49<br>(4.04, 4.95)          | 4.35<br>(3.90, 4.81)    | 3.72<br>(3.30, 4.14)    | 0.015                |
| Doctor prescribed iron supplements (%)        | 2.08<br>(1.76, 2.39)         | 1.38<br>(1.13, 1.63)    | 1.15<br>(0.92, 1.38)    | <0.0001              | 2.82<br>(2.45, 3.19)          | 3.02<br>(2.63, 3.41)    | 2.48<br>(2.13, 2.84)    | 0.226                |
| <b>Reported over 2 years</b>                  |                              |                         |                         |                      |                               |                         |                         |                      |
| Any iron supplements (%)                      | 15.08<br>(13.88, 16.29)      | 13.00<br>(11.89, 14.12) | 11.71<br>(10.64, 12.79) | <0.0001              | 20.65<br>(19.24, 22.06)       | 19.07<br>(17.70, 20.45) | 19.40<br>(17.99, 20.81) | 0.231                |
| Pica (%)                                      | 0.84<br>(0.53, 1.16)         | 0.46<br>(0.24, 0.69)    | 0.66<br>(0.38, 0.93)    | 0.520                | 1.71<br>(1.25, 2.17)          | 1.72<br>(1.26, 2.19)    | 1.38<br>(0.96, 1.79)    | 0.386                |

Data presented are percentage (95% CI) unless otherwise stated.

<sup>1</sup> Additional missing data during the main trial were 0.6% for each symptom, 6.4% for any iron supplements and 7.2% for pica.

<sup>2</sup> Percentage of individuals reporting these symptoms at 6-monthly intervals, combining data from all the 6-monthly questionnaires during the main trial.

<sup>3</sup> P-values are for linear trend across groups, from analyses adjusted for baseline characteristics (centre, age, weight, new donor status).



**eTable 6.** Baseline characteristics by sex and reminder approaches in the extension study.

| Characteristics                                                         | Men (N = 10843 randomised) |                  | Women (N = 9914 randomised) |                  |
|-------------------------------------------------------------------------|----------------------------|------------------|-----------------------------|------------------|
|                                                                         | Routine                    | Active           | Routine                     | Active           |
| No (% out of total randomised) <sup>1</sup>                             | 5420 (50%)                 | 5423 (50%)       | 4958 (50%)                  | 4956 (50%)       |
| <b>At beginning of main trial</b>                                       |                            |                  |                             |                  |
| Age (years)                                                             | 48.2 (13.2)                | 48.0 (13.3)      | 45.3 (13.6)                 | 45.2 (13.3)      |
| Weight (kg)                                                             | 85.5 (14.1)                | 85.1 (14.2)      | 71.5 (14.2)                 | 71.8 (14.6)      |
| New donor <sup>2</sup>                                                  | 239 (4.4%)                 | 258 (4.8%)       | 352 (7.1%)                  | 337 (6.8%)       |
| Blood donation rate in previous 2 years (times/yr)                      | 2.16 (0.86)                | 2.18 (0.87)      | 1.82 (0.82)                 | 1.82 (0.81)      |
| Deferral for low Hb per attendance in previous 2 years (%) <sup>3</sup> | 243 (1.02%)                | 247 (1.04%)      | 610 (3.25%)                 | 645 (3.44%)      |
| SF-36 Physical wellbeing score                                          | 56.8 (4.4)                 | 56.9 (4.2)       | 57.0 (4.5)                  | 57.1 (4.4)       |
| SF-36 Mental wellbeing score                                            | 55.2 (5.5)                 | 55.1 (5.5)       | 54.2 (5.9)                  | 53.9 (6.3)       |
| Haemoglobin (g/L)                                                       | 149.4 (9.7)                | 149.6 (9.7)      | 134.2 (8.7)                 | 134.5 (9.0)      |
| Haemoglobin <135 g/L (men) or <125 g/L (women) (%) <sup>4</sup>         | 156 (3.7%)                 | 170 (4.1%)       | 387 (10.7%)                 | 382 (10.6%)      |
| Ferritin (µg/L) <sup>5</sup>                                            | 44.4 (28.0-73.0)           | 43.7 (27.0-73.0) | 26.3 (16.0-46.0)            | 25.8 (16.0-45.0) |
| Ferritin <15 µg/L (%) <sup>4</sup>                                      | 262 (6.6%)                 | 276 (7.0%)       | 664 (19.3%)                 | 703 (20.5%)      |
| <b>During main trial</b>                                                |                            |                  |                             |                  |
| Blood donation rate (times/yr)                                          | 3.95 (1.09)                | 3.94 (1.10)      | 2.69 (0.81)                 | 2.68 (0.82)      |
| Deferral for low Hb per attendance (%) <sup>3</sup>                     | 1652 (3.54%)               | 1728 (3.70%)     | 1670 (5.50%)                | 1663 (5.49%)     |
| Deferral for other reasons per attendance (%) <sup>3</sup>              | 1771 (3.79%)               | 1765 (3.78%)     | 1687 (5.56%)                | 1684 (5.56%)     |
| Fainting at donation session per attendance (%) <sup>3</sup>            | 107 (0.23%)                | 97 (0.21%)       | 171 (0.56%)                 | 191 (0.63%)      |
| <b>At end of main trial (ie, beginning of the extension study)</b>      |                            |                  |                             |                  |
| SF-36 Physical wellbeing score                                          | 56.7 (4.8)                 | 56.7 (4.8)       | 56.7 (5.1)                  | 56.7 (5.3)       |
| SF-36 Mental wellbeing score                                            | 54.3 (6.4)                 | 54.2 (6.4)       | 53.1 (7.1)                  | 53.0 (7.3)       |
| Haemoglobin (g/L)                                                       | 144.1 (11.5)               | 144.3 (11.6)     | 131.3 (11.2)                | 131.3 (11.3)     |
| Haemoglobin <135 g/L (men) or <125 g/L (women) (%) <sup>4</sup>         | 597 (14.2%)                | 559 (13.3%)      | 633 (17.3%)                 | 613 (16.8%)      |
| Ferritin (µg/L) <sup>5</sup>                                            | 29.2 (17.0-52.0)           | 28.6 (16.0-52.0) | 23.2 (13.0-43.0)            | 22.8 (13.0-42.0) |
| Ferritin <15 µg/L (%) <sup>4</sup>                                      | 664 (17.2%)                | 690 (17.8%)      | 845 (25.0%)                 | 819 (24.5%)      |
| Completed questionnaire                                                 | 5154 (95.1%)               | 5133 (94.7%)     | 4650 (93.8%)                | 4672 (94.3%)     |
| Gave blood sample                                                       | 5293 (97.7%)               | 5312 (98.0%)     | 4798 (96.8%)                | 4816 (97.2%)     |

Data presented are mean (standard deviation) or number of participants (%) unless otherwise stated.

<sup>1</sup> Additional missing data: None for age, weight, or donation history; SF-36 Physical/Mental wellbeing scores (0.4% baseline, 6.4% end of main trial), haemoglobin (1.8% baseline, 2.6% end of main trial), ferritin (6.4% baseline, 10.5% end of main trial).

<sup>2</sup> A participant who has not previously provided a full blood donation.

<sup>3</sup> Total number (%) of deferrals or faints out of all attendances within 2-year period.

<sup>4</sup> Amongst those donating blood at baseline or end of main trial.

<sup>5</sup> Values are geometric means and interquartile ranges

**eTable 7.** Blood donations and other outcomes during the extension study by and reminder approaches.

| Outcomes                                                        | Men (N = 10843 randomised) |                         |                      | Women (N = 9914 randomised) |                         |                      |
|-----------------------------------------------------------------|----------------------------|-------------------------|----------------------|-----------------------------|-------------------------|----------------------|
|                                                                 | Routine                    | Active                  | P-value <sup>6</sup> | Routine                     | Active                  | P-value <sup>6</sup> |
| No (% out of total in extension) <sup>1</sup>                   | 5420 (50%)                 | 5423 (50%)              | -                    | 4958 (50%)                  | 4956 (50%)              | -                    |
| Follow up time (yrs), median (IQR)                              | 1.2 (0.8-1.3)              | 1.1 (0.8-1.3)           | -                    | 1.1 (0.6-1.2)               | 1.1 (0.6-1.3)           | -                    |
| Blood donation rate (times/yr)                                  | 3.39<br>(3.34, 3.44)       | 3.50<br>(3.45, 3.54)    | 0.0003               | 2.28<br>(2.24, 2.31)        | 2.33<br>(2.30, 2.37)    | 0.009                |
| Deferral for low Hb (%) <sup>2</sup>                            | 4.64<br>(4.34, 4.95)       | 4.64<br>(4.34, 4.94)    | 0.878                | 5.48<br>(5.05, 5.91)        | 5.29<br>(4.87, 5.71)    | 0.435                |
| Deferral for other reasons (%) <sup>2</sup>                     | 3.49<br>(3.23, 3.76)       | 3.65<br>(3.39, 3.91)    | 0.378                | 4.77<br>(4.38, 5.16)        | 4.87<br>(4.48, 5.26)    | 0.748                |
| Fainting at donation session (%) <sup>2</sup>                   | 0.17<br>(0.11, 0.23)       | 0.16<br>(0.11, 0.21)    | 0.747                | 0.47<br>(0.34, 0.60)        | 0.50<br>(0.37, 0.63)    | 0.854                |
| SF-36 Physical wellbeing score                                  | 56.5<br>(56.3, 56.6)       | 56.5<br>(56.4, 56.7)    | 0.548                | 56.5<br>(56.3, 56.7)        | 56.4<br>(56.2, 56.6)    | 0.164                |
| SF-36 Mental wellbeing score                                    | 54.2<br>(54.1, 54.4)       | 54.1<br>(53.9, 54.3)    | 0.689                | 53.2<br>(52.9, 53.4)        | 53.1<br>(52.9, 53.3)    | 0.606                |
| Haemoglobin (g/L)                                               | 142.6<br>(142.3, 142.9)    | 142.6<br>(142.2, 142.9) | 0.793                | 130.9<br>(130.6, 131.2)     | 130.9<br>(130.6, 131.2) | 0.547                |
| Haemoglobin <135 g/L (men) or <125 g/L (women) (%) <sup>3</sup> | 16.88<br>(15.57, 18.18)    | 17.52<br>(16.19, 18.85) | 0.697                | 19.34<br>(17.87, 20.81)     | 18.79<br>(17.31, 20.26) | 0.617                |
| Ferritin (µg/L) <sup>4</sup>                                    | 30.7<br>(29.8, 31.5)       | 30.0<br>(29.2, 30.8)    | 0.868                | 25.8<br>(25.1, 26.5)        | 24.9<br>(24.2, 25.7)    | 0.072                |
| Ferritin <15 µg/L (%) <sup>3</sup>                              | 15.62<br>(14.27, 16.97)    | 16.67<br>(15.28, 18.06) | 0.457                | 19.95<br>(18.37, 21.53)     | 22.24<br>(20.57, 23.91) | 0.034                |
| Serious adverse events (%) <sup>5</sup>                         | 2.69<br>(2.24, 3.15)       | 2.63<br>(2.18, 3.08)    | 0.880                | 3.39<br>(2.86, 3.93)        | 2.88<br>(2.39, 3.38)    | 0.174                |

Data presented are mean or percentage (95% CI) unless otherwise stated.

<sup>1</sup> Additional missing data during the extension study were: <0.2% for blood donation, deferrals, or fainting; 21.0% for SF-36 Physical/Mental wellbeing scores, 25.0% for haemoglobin, 34.1% for ferritin. Higher SF-36 scores indicate better physical/mental wellbeing (0-100 scale range).

<sup>2</sup> Deferral or fainting rate per donation session attended during the extension study.

<sup>3</sup> Amongst those donating blood at end of extension study.

<sup>4</sup> Values are geometric means.

<sup>5</sup> Percentage of participants reporting any serious adverse events during the extension study, in any of the 6-monthly questionnaires: including doctor-confirmed heart failure, heart attack, angina, stroke, or transient ischaemic attack; hospital visit for falls or transport accidents

<sup>6</sup> P-values are for group differences, from analyses adjusted for baseline characteristics (centre, age, weight, new donor status) and value of the outcome at baseline (where available) and main trial randomised group (as linear trend).

**eTable 8.** Reported symptoms during the extension study by inter-donation intervals.

| Outcomes                                      | Men (N = 10843 in extension) |                         |                         |                      | Women (N = 9914 in extension) |                         |                         |                      |
|-----------------------------------------------|------------------------------|-------------------------|-------------------------|----------------------|-------------------------------|-------------------------|-------------------------|----------------------|
|                                               | 8 weeks                      | 10 weeks                | 12 weeks                | P-value <sup>3</sup> | 12 weeks                      | 14 weeks                | 16 weeks                | P-value <sup>3</sup> |
| No (% out of total in extension) <sup>1</sup> | 3554 (33%)                   | 3695 (34%)              | 3594 (33%)              | -                    | 3369 (34%)                    | 3309 (33%)              | 3236 (33%)              | -                    |
| <b>Reported 6-monthly<sup>2</sup></b>         |                              |                         |                         |                      |                               |                         |                         |                      |
| Fainting or feeling faint (%)                 | 5.74<br>(5.09, 6.38)         | 4.99<br>(4.40, 5.57)    | 4.70<br>(4.11, 5.28)    | 0.018                | 8.29<br>(7.49, 9.08)          | 7.59<br>(6.84, 8.35)    | 7.79<br>(6.99, 8.59)    | 0.426                |
| More tired than usual (%)                     | 16.64<br>(15.59, 17.68)      | 15.08<br>(14.09, 16.06) | 15.19<br>(14.18, 16.20) | 0.065                | 20.29<br>(19.10, 21.47)       | 19.26<br>(18.09, 20.43) | 20.08<br>(18.87, 21.29) | 0.868                |
| More breathless than usual (%)                | 5.00<br>(4.38, 5.61)         | 4.67<br>(4.08, 5.26)    | 4.02<br>(3.48, 4.56)    | 0.016                | 5.53<br>(4.88, 6.18)          | 4.69<br>(4.08, 5.30)    | 4.92<br>(4.29, 5.56)    | 0.181                |
| Palpitations (%)                              | 5.42<br>(4.75, 6.09)         | 5.58<br>(4.91, 6.26)    | 5.26<br>(4.60, 5.92)    | 0.873                | 11.69<br>(10.68, 12.71)       | 9.93<br>(8.99, 10.87)   | 11.23<br>(10.23, 12.24) | 0.611                |
| Dizziness (%)                                 | 8.84<br>(8.02, 9.66)         | 8.22<br>(7.45, 8.99)    | 7.55<br>(6.82, 8.29)    | 0.016                | 13.87<br>(12.84, 14.90)       | 13.03<br>(12.02, 14.03) | 13.05<br>(12.03, 14.08) | 0.300                |
| Chest pain (%)                                | 3.19<br>(2.71, 3.66)         | 3.19<br>(2.71, 3.68)    | 2.91<br>(2.45, 3.37)    | 0.425                | 2.47<br>(2.03, 2.90)          | 2.50<br>(2.06, 2.93)    | 2.67<br>(2.19, 3.14)    | 0.501                |
| Restless legs (%)                             | 14.55<br>(13.46, 15.64)      | 14.25<br>(13.18, 15.33) | 13.92<br>(12.84, 14.99) | 0.362                | 20.67<br>(19.33, 22.01)       | 20.45<br>(19.10, 21.81) | 20.09<br>(18.74, 21.45) | 0.500                |
| Doctor diagnosed low iron levels (%)          | 6.60<br>(5.94, 7.27)         | 4.35<br>(3.82, 4.88)    | 3.39<br>(2.91, 3.88)    | <0.0001              | 6.08<br>(5.41, 6.75)          | 5.66<br>(5.02, 6.30)    | 4.59<br>(3.99, 5.19)    | 0.002                |
| Doctor prescribed iron supplements (%)        | 4.01<br>(3.48, 4.54)         | 2.50<br>(2.09, 2.92)    | 2.29<br>(1.88, 2.70)    | <0.0001              | 4.57<br>(3.97, 5.17)          | 4.46<br>(3.86, 5.05)    | 3.53<br>(3.00, 4.06)    | 0.014                |
| Pica (%)                                      | 0.79<br>(0.52, 1.07)         | 0.63<br>(0.42, 0.83)    | 0.68<br>(0.44, 0.91)    | 0.810                | 1.82<br>(1.41, 2.23)          | 1.64<br>(1.24, 2.04)    | 1.52<br>(1.13, 1.91)    | 0.357                |
| <b>Reported at end of extension study</b>     |                              |                         |                         |                      |                               |                         |                         |                      |
| Any iron supplements (%)                      | 19.83<br>(18.35, 21.31)      | 15.59<br>(14.28, 16.90) | 13.40<br>(12.15, 14.65) | <0.0001              | 23.88<br>(22.25, 25.51)       | 21.22<br>(19.65, 22.79) | 21.70<br>(20.10, 23.29) | 0.063                |

Data presented are percentage (95% CI) unless otherwise stated.

<sup>1</sup> Additional missing data during the extension study were 11% for each symptom, and 21% for any iron supplements.

<sup>2</sup> Percentage of individuals reporting these symptoms at 6-monthly intervals, combining data from all the 6-monthly questionnaires during the extension study.

<sup>3</sup> P-values are for linear trend across groups, from analyses adjusted for baseline characteristics (centre, age, weight, new donor status).

**eTable 9.** Haematological markers at end of extension study by inter-donation intervals.

| Outcomes                                          | Men (N = 10843 in extension) |                      |                      |                      | Women (N = 9914 in extension) |                      |                      |                      |
|---------------------------------------------------|------------------------------|----------------------|----------------------|----------------------|-------------------------------|----------------------|----------------------|----------------------|
|                                                   | 8 weeks                      | 10 weeks             | 12 weeks             | P-value <sup>2</sup> | 12 weeks                      | 14 weeks             | 16 weeks             | P-value <sup>2</sup> |
| No (% out of total in extension) <sup>1</sup>     | 3554 (33%)                   | 3695 (34%)           | 3594 (33%)           | -                    | 3369 (34%)                    | 3309 (33%)           | 3236 (33%)           | -                    |
| Red blood cell count, RBC (x10 <sup>12</sup> /L)  | 5.03<br>(5.02, 5.05)         | 5.05<br>(5.04, 5.07) | 5.05<br>(5.03, 5.06) | 0.0002               | 4.62<br>(4.61, 4.64)          | 4.62<br>(4.61, 4.63) | 4.64<br>(4.63, 4.66) | 0.0004               |
| Haematocrit, HCT (%)                              | 45.6<br>(45.5, 45.8)         | 46.1<br>(46.0, 46.3) | 46.4<br>(46.3, 46.5) | <0.0001              | 42.7<br>(42.5, 42.8)          | 42.9<br>(42.7, 43.0) | 43.0<br>(42.8, 43.1) | <0.0001              |
| Mean corpuscular volume , MCV (fL)                | 90.9<br>(90.7, 91.2)         | 91.5<br>(91.3, 91.7) | 92.2<br>(91.9, 92.4) | <0.0001              | 92.5<br>(92.2, 92.7)          | 92.9<br>(92.7, 93.2) | 92.8<br>(92.6, 93.0) | 0.046                |
| Mean corpuscular haemoglobin, MCH (pg)            | 28.1<br>(28.0, 28.2)         | 28.3<br>(28.2, 28.4) | 28.6<br>(28.6, 28.7) | <0.0001              | 28.2<br>(28.1, 28.4)          | 28.4<br>(28.3, 28.5) | 28.5<br>(28.4, 28.6) | <0.0001              |
| Mean corpuscular Hb concentration, MCHC (g/dL)    | 30.9<br>(30.8, 30.9)         | 30.9<br>(30.9, 31.0) | 31.1<br>(31.0, 31.1) | <0.0001              | 30.5<br>(30.4, 30.6)          | 30.6<br>(30.5, 30.6) | 30.7<br>(30.7, 30.7) | <0.0001              |
| Reticulocyte Hb equivalent, RET-He (pg)           | 32.4<br>(32.3, 32.5)         | 32.7<br>(32.6, 32.8) | 33.2<br>(33.1, 33.3) | <0.0001              | 32.3<br>(32.2, 32.4)          | 32.5<br>(32.4, 32.7) | 32.8<br>(32.7, 32.9) | <0.0001              |
| Platelet count, PLT (x10 <sup>9</sup> /L)         | 235<br>(233, 237)            | 235<br>(233, 237)    | 234<br>(232, 236)    | 0.107                | 269<br>(267, 271)             | 266<br>(263, 269)    | 267<br>(264, 269)    | <0.0001              |
| White blood cell count, WBC (x10 <sup>9</sup> /L) | 6.07<br>(6.01, 6.13)         | 6.05<br>(6.00, 6.11) | 6.05<br>(5.99, 6.10) | 0.176                | 6.52<br>(6.45, 6.58)          | 6.48<br>(6.41, 6.54) | 6.54<br>(6.47, 6.60) | 0.695                |
| Neutrophil count, NEUT# (x10 <sup>9</sup> /L)     | 3.50<br>(3.46, 3.55)         | 3.49<br>(3.44, 3.53) | 3.48<br>(3.44, 3.53) | 0.394                | 3.78<br>(3.73, 3.83)          | 3.76<br>(3.71, 3.81) | 3.77<br>(3.72, 3.82) | 0.728                |

Data presented are mean (95% CI) unless otherwise stated.

<sup>1</sup> Additional missing data during the extension study were 25% for each of the haematological markers.

<sup>2</sup> P-values are for linear trend across groups, from analyses adjusted for baseline characteristics (centre, age, weight, new donor status) and value of the outcome at baseline (where available).

**eFigure 1.** Extended CONSORT flow chart: recruitment, participation, and completeness of main outcomes in the extension study.

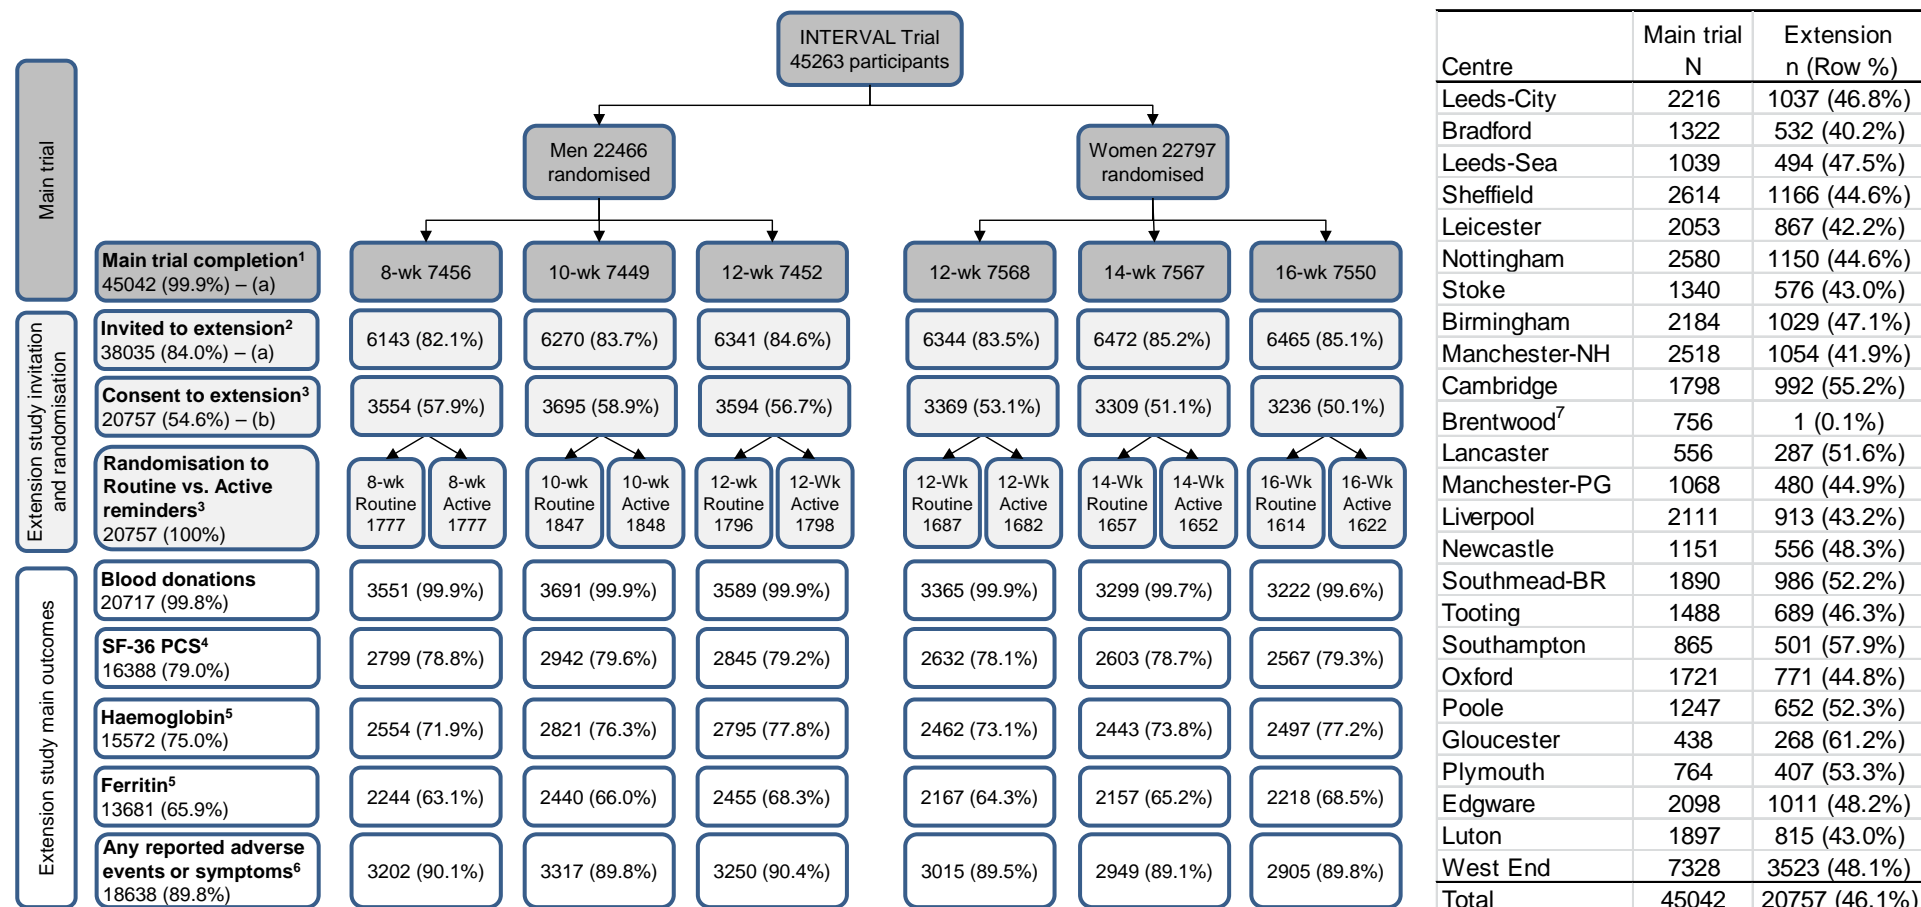

Percentages are calculated with respect to numbers randomised in the main trial (a), or invited to the extension study (b), or otherwise randomised in the extension study.

- <sup>1</sup> Excluding 221 participants who were randomised but later withdrew consent for any further use of their data.
- <sup>2</sup> Due to staggered rollout of the main 2-year trial, only participants able to contribute at least 6 months of follow-up were considered eligible for invitation to the extension study.
- <sup>3</sup> Participants not consenting to the extension study reverted to routine NHSBT management (men 12-wk, women 16-wk) and reminders.
- <sup>4</sup> Number for whom a physical component wellbeing score (PCS) could be calculated at the end of the extension study.
- <sup>5</sup> Number who provided a research blood sample at end of the extension study on which haemoglobin and ferritin were measured.
- <sup>6</sup> Number who responded to at least one question in any of the 6-monthly questionnaires administered during their participation in the extension study.
- <sup>7</sup> The Brentwood centre closed down after the main trial, but the single participant shown was donating elsewhere during the extension study.

**eFigure 2.** Whole blood donation rates during the extension study by sex and reminder approaches.

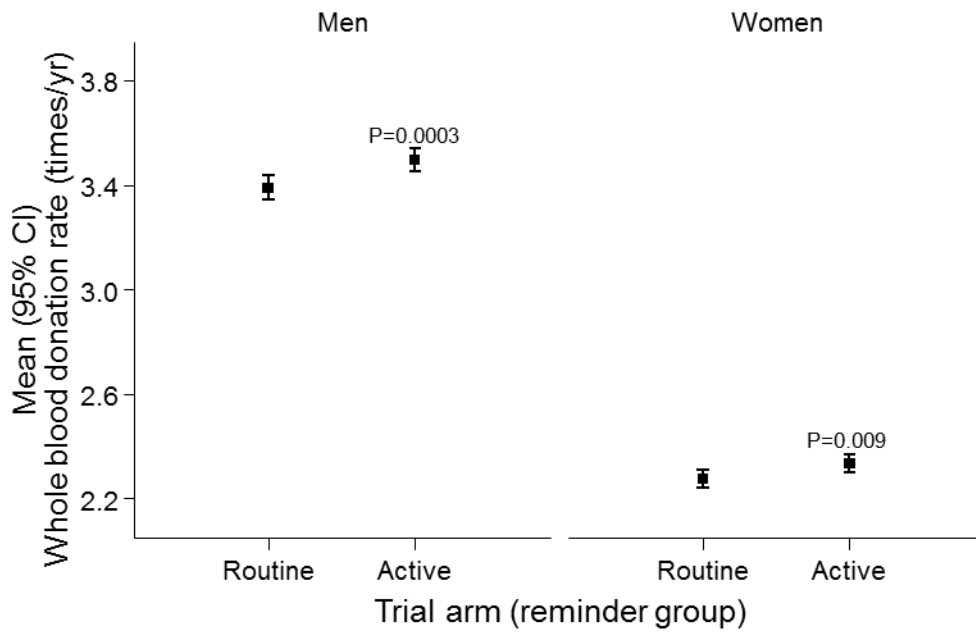

The p-values compare randomised groups adjusted for baseline characteristics (centre, age, weight, new donor status).

**eFigure 3.** Reported symptoms by sex and inter-donation intervals among participants in the extension study.

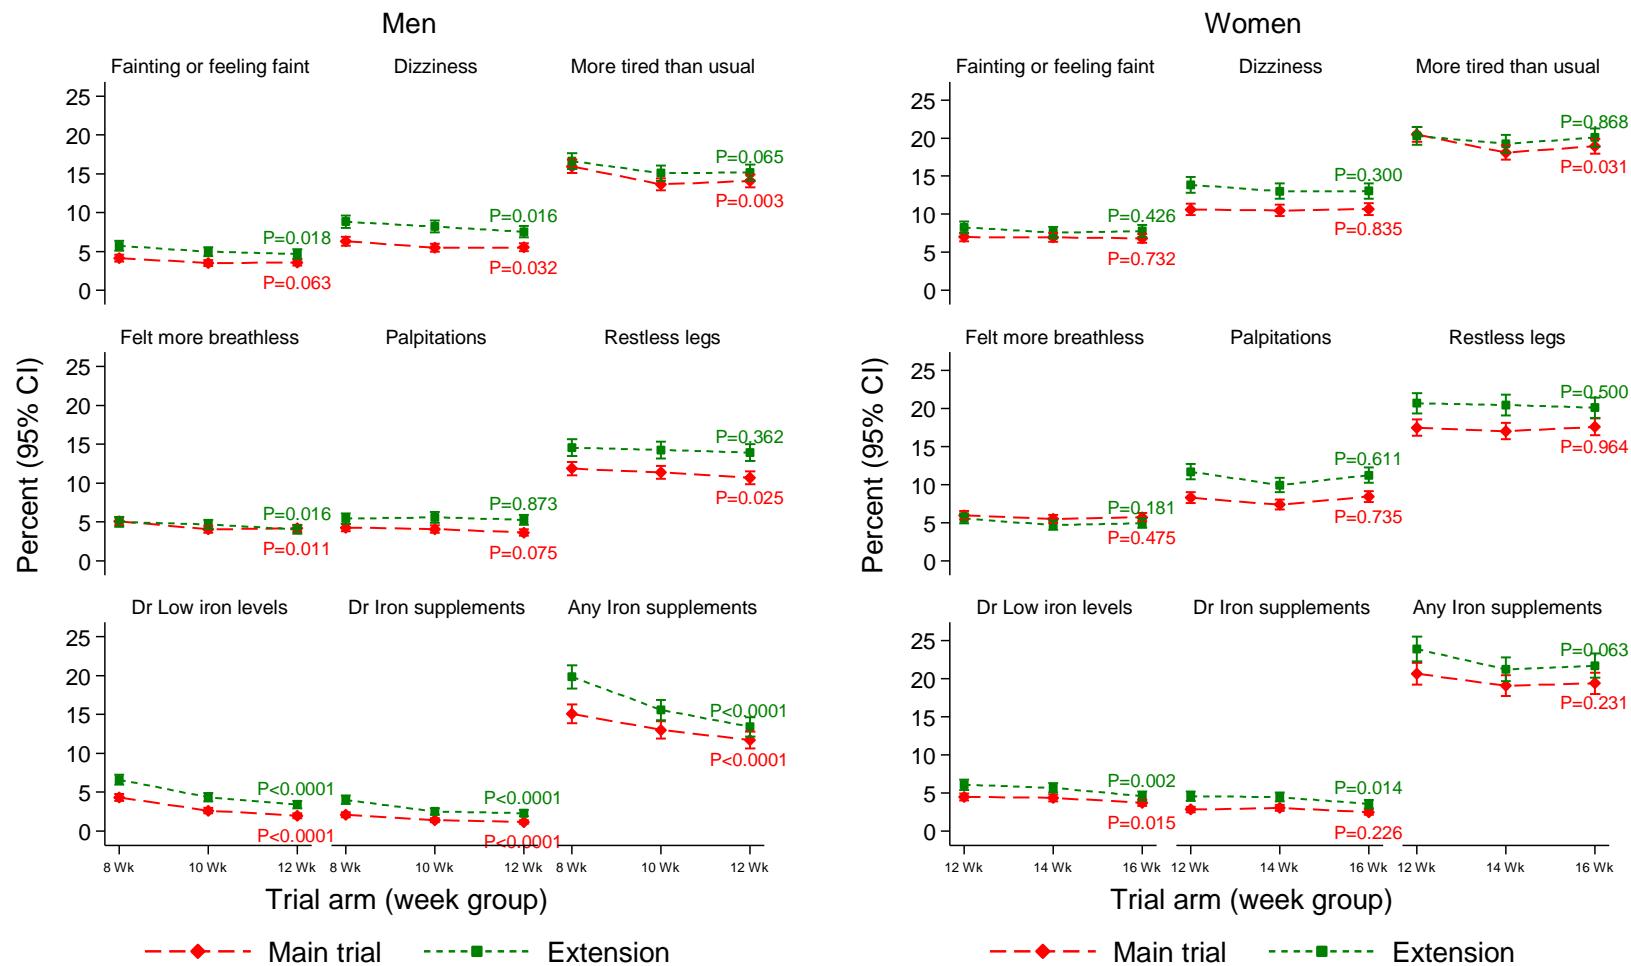

P-values assess trends across randomised groups, adjusted for baseline characteristics (centre, age, weight, new donor status).

**eFigure 4.** Low haemoglobin deferral rates by sex and inter-donation intervals among participants in the extension study.

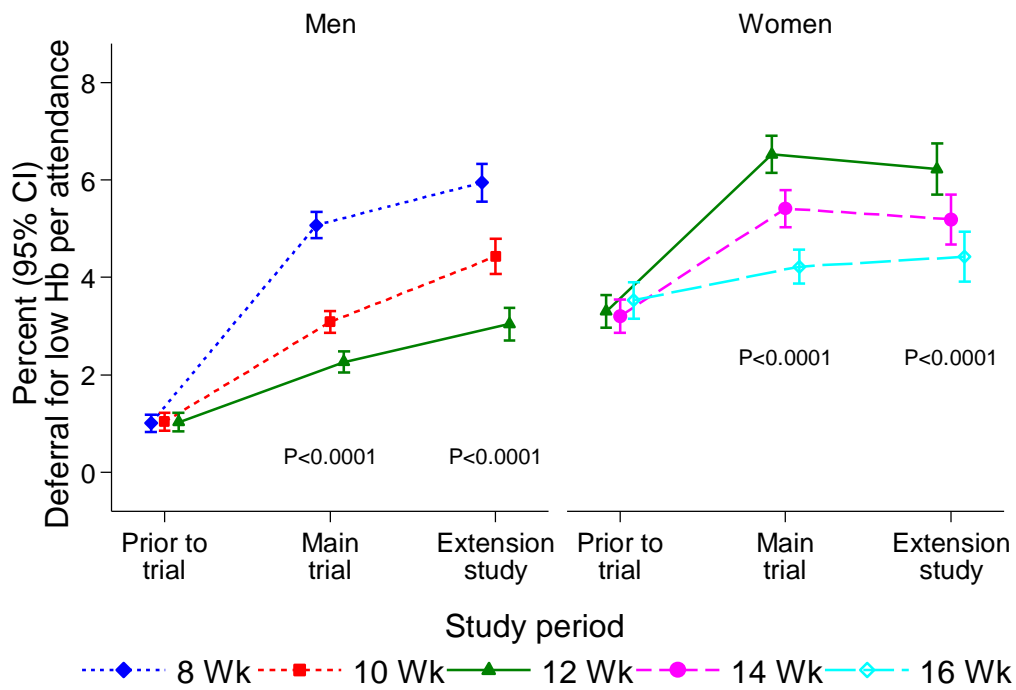

P-values assess trends across randomised groups, adjusted for baseline characteristics (centre, age, weight, new donor status).



**eFigure 5.** Haemoglobin concentrations below regulatory thresholds (a), and ferritin concentrations <15 µg/L (b), by sex and inter-donation intervals at the end of the extension study, end of the main trial period, and at baseline.

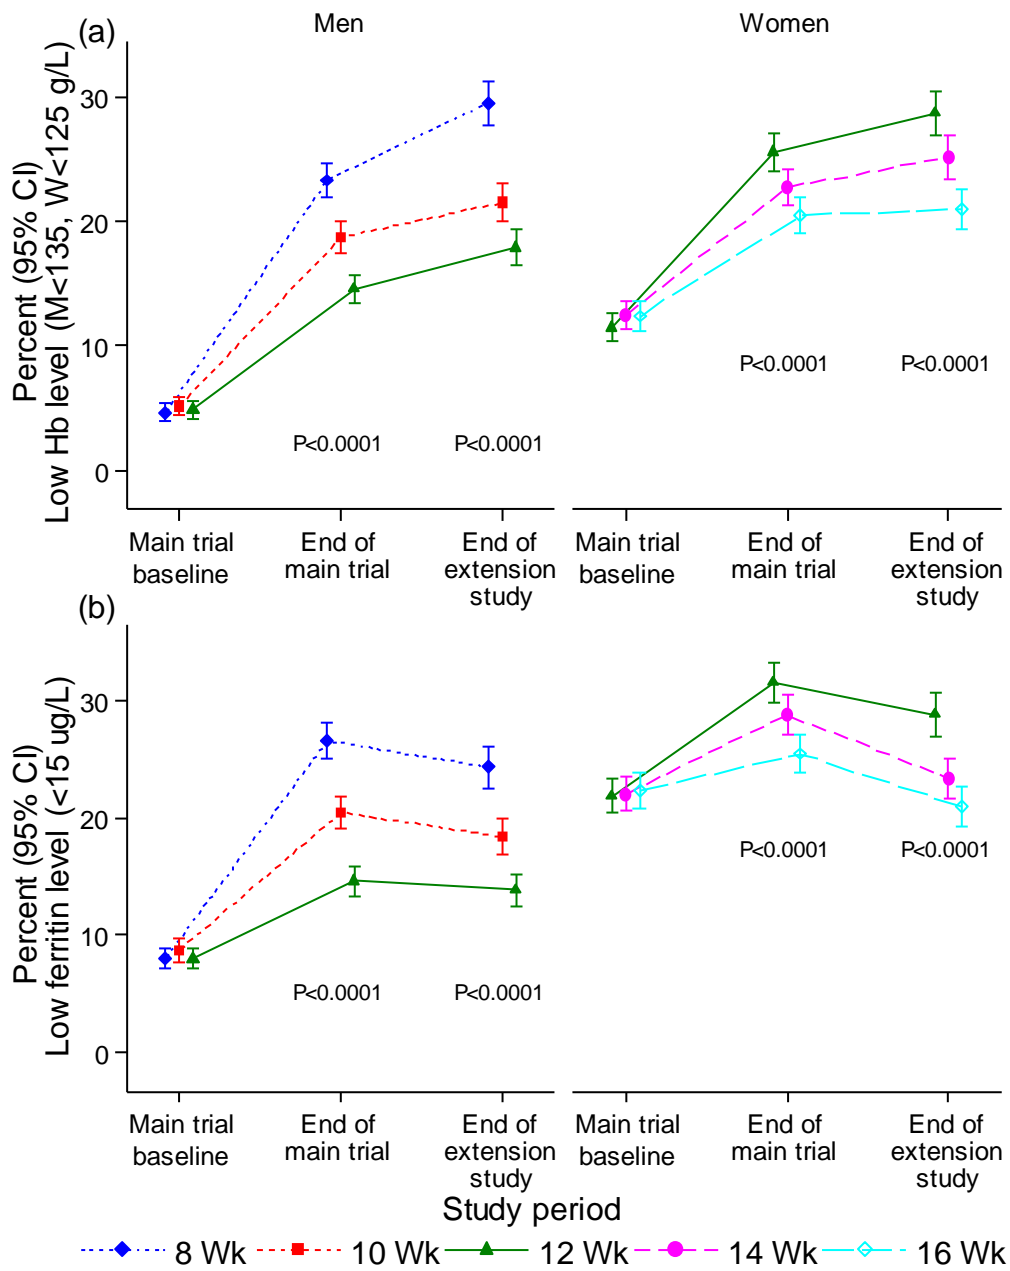

P-values assess trends across randomised groups, adjusted for baseline characteristics (centre, age, weight, new donor status, and low haemoglobin status (in a) or low ferritin status (in b)).

**eFigure 6.** Trends in standardized haematological characteristics by inter-donation intervals restricted to participants with ferritin measured at the end of the extension study.

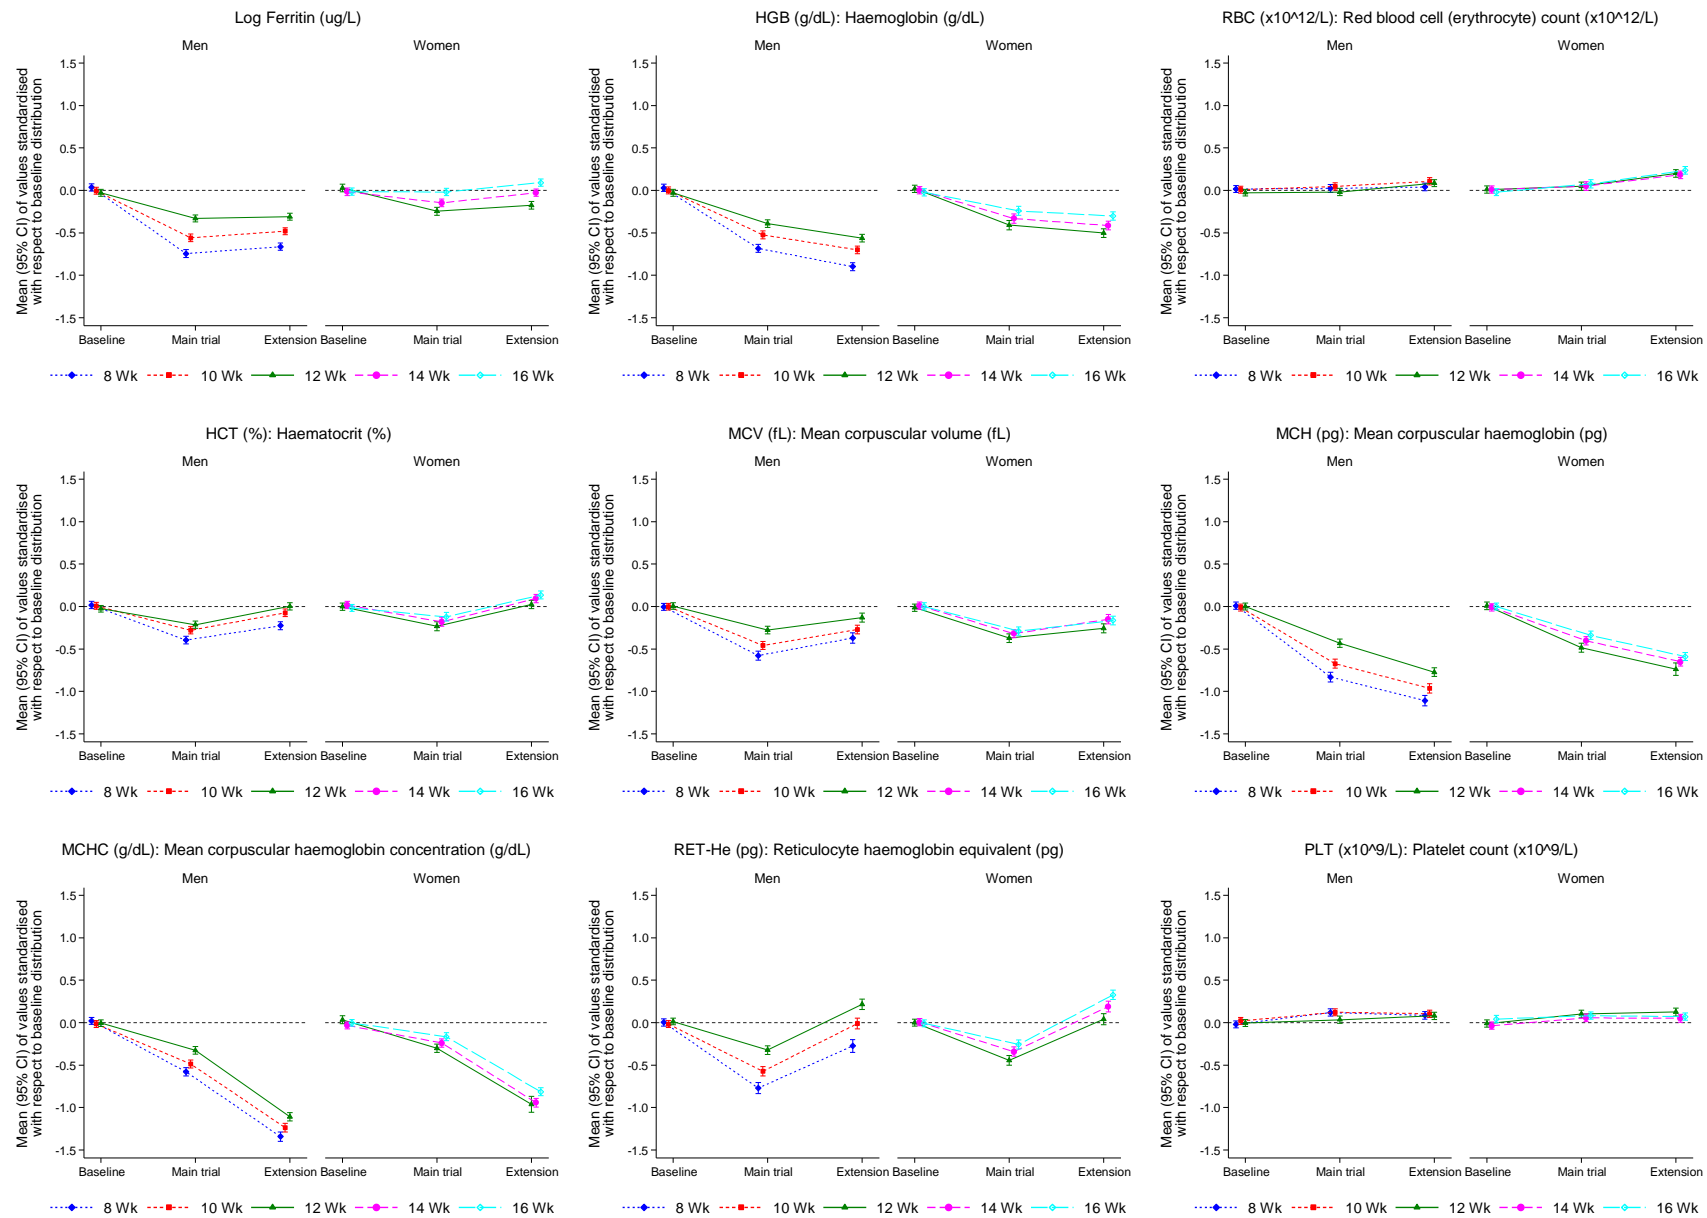

**eFigure 7.** Trends in reported use of iron supplements by inter-donation intervals among participants in the extension study.

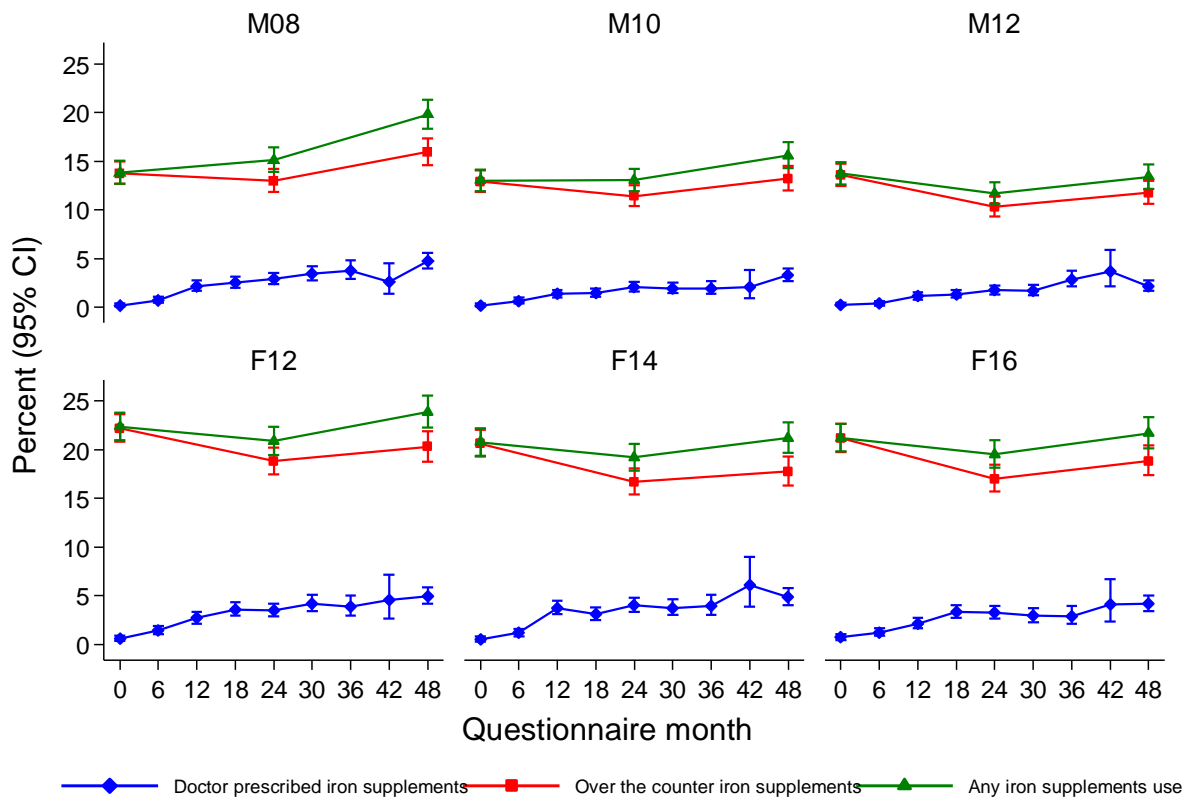

The randomised inter-donation week groups are abbreviated as M08, M10, M12 for men (top panels) and F12, F14, F16 for women (bottom panels).

**eFigure 8.** Haemoglobin concentrations by inter-donation intervals, stratified according to reported use of any iron supplements during the main trial or during the extension study, among participants in the extension study.

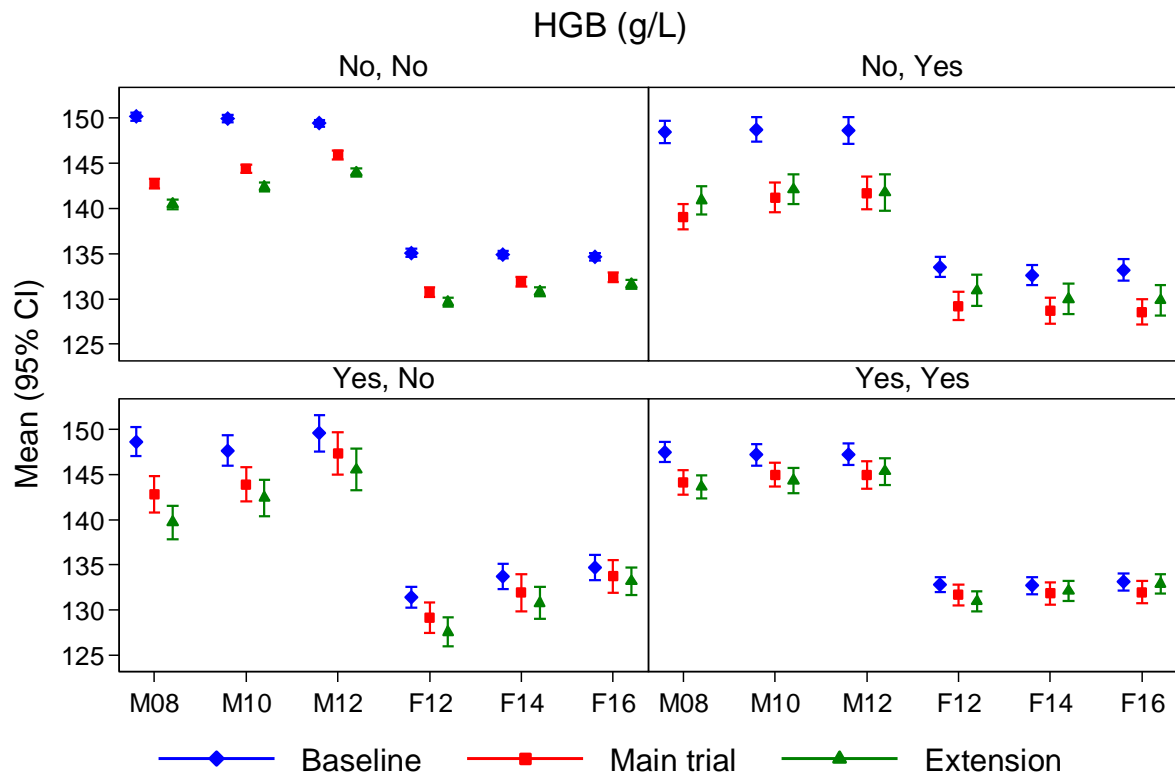

Graphs by Iron Suppl (Main trial) and Iron Suppl (Extension)

The randomised inter-donation week groups (x-axis) are abbreviated as M08, M10, M12 for men and F12, F14, F16 for women.

**eFigure 9.** Ferritin concentrations by inter-donation intervals, stratified according to reported use of any iron supplements during the main trial or during the extension study among participants in the extension study.

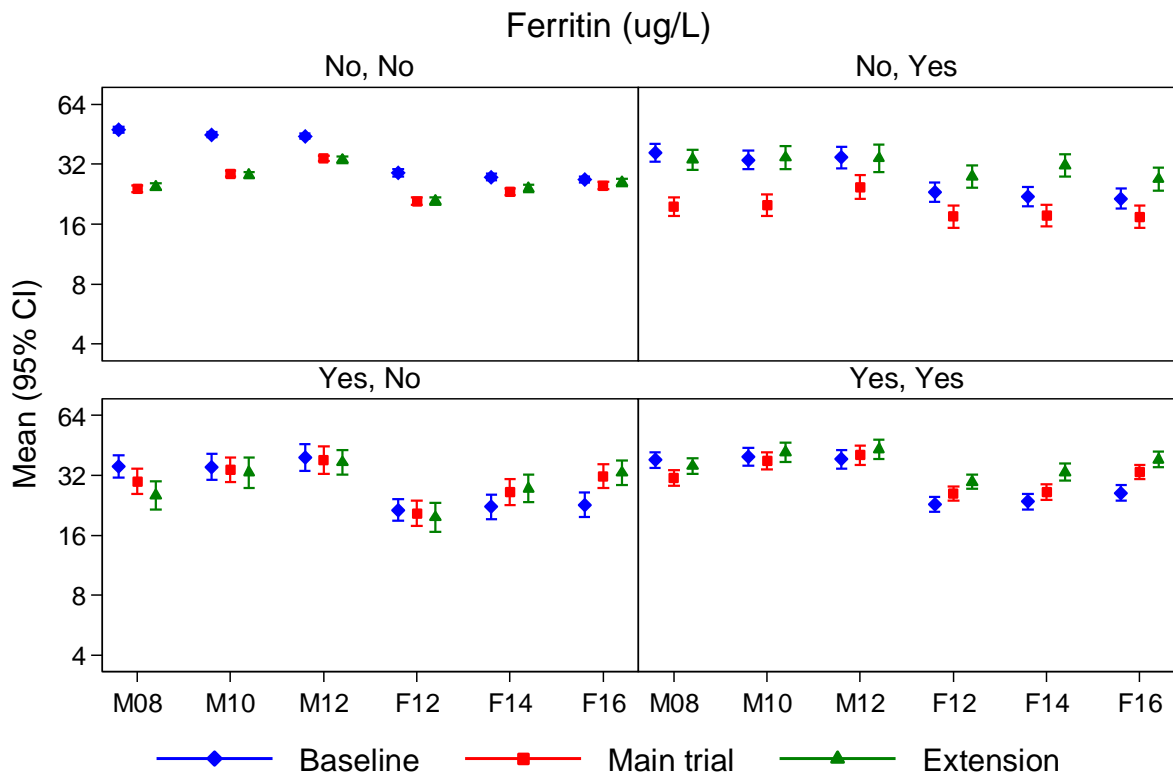

Graphs by Iron Suppl (Main trial) and Iron Suppl (Extension)

The randomised inter-donation week groups (x-axis) are abbreviated as M08, M10, M12 for men and F12, F14, F16 for women.

**eFigure 10.** Reticulocyte haemoglobin concentrations by inter-donation intervals, stratified according to reported use of any iron supplements during the main trial or during the extension study among participants in the extension study.

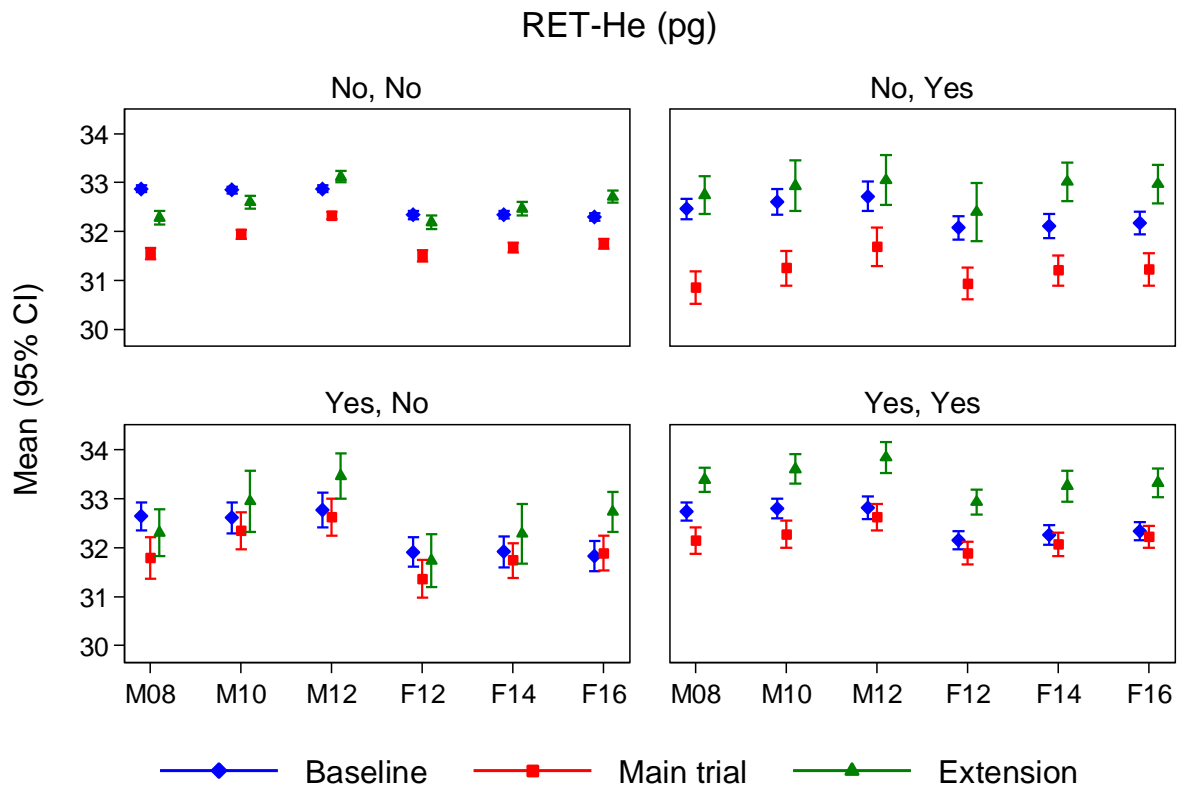

Graphs by Iron Suppl (Main trial) and Iron Suppl (Extension)

The randomised inter-donation week groups (x-axis) are abbreviated as M08, M10, M12 for men and F12, F14, F16 for women.

## **eAppendix**

### **Extension study invitations, contributing data, and protocols for appointment reminders**

#### ***Extension study invitations***

Participants were eligible for further participation in the extension study immediately after completion of their 2-year participation in the main trial, provided they could contribute at least 6 months of follow-up before 15 June 2016. The end of main trial protocol included an email sent by the coordinating centre to alert donors of their 2-year anniversary date and procedures. This alert email was sent at the participant's 2-year anniversary date minus twice their allocated inter-donation interval (eg, at -16 weeks for 8-week group). A further reminder email was sent at 3 weeks prior to the 2-year anniversary date for those who had not made an appointment.

The design and ethical approval of the extension study was finalised after a few of the eligible participants had already completed their 2-year participation in the main trial, and after others had already received an email about their 2-year anniversary date. Therefore, the extension study invitations were either retrospective (ie, invited after the 2-year donation alert email had been sent) or prospective (ie, invited before the 2-year donation alert email had been sent). Active (ie, more intensive) reminders were used for all participants at the final planned attendance at the end of the extension study, to maximise the number of research blood samples taken at that time.

#### ***Data contributing to the extension study***

Only data collected after randomisation in the extension study contributed to the data analysed. So for retrospectively recruited participants, there was a gap between the main trial and the extension study. Furthermore, for data derived from attendances for blood donation, the donation due at the end of the extension study was ignored, because all participants were more intensively reminded to attend this appointment, and follow-up was curtailed at the time the first reminder for this last appointment was sent. 30 days was allowed for completion of the 6-monthly online questionnaires, and up to the end of August 2016 for the final questionnaire.

#### ***Procedures to encourage donation attendance***

The main INTERVAL trial used a more comprehensive approach ("active") than that routinely used by NHSBT ("routine") to remind participants to make and keep blood donation appointments (**eAppendix Figure**). First, the main trial's reminder approach applied to all participants rather than, as in routine NHSBT practice, a subset of donors judged to be high priority by various criteria (eg, blood group, reliability, sex, recent contact). Second, participants in the main trial who had not made an initial donation appointment within 14 days

of randomisation received up to three reminders using a fixed protocol of telephone and/or email messages. Third, when a booking had not been made for a subsequent appointment three weeks prior to its due date, participants received an email reminder to book an appointment. Fourth, all participants received a text message reminder one day in advance of each appointment. Fifth, after failure to attend an appointment, participants were encouraged to make new appointments using the process described above for making an initial appointment after randomisation into the main trial. The NHSBT's routine reminder approach had some of the preceding features but differed in their timing and intensity of use.



## eAppendix Figure

| Donor with appointment                                                                                                              |                                              |                                               | Donor without appointment                                                             |                                                                                          |                                                                                         |                                                                                         |
|-------------------------------------------------------------------------------------------------------------------------------------|----------------------------------------------|-----------------------------------------------|---------------------------------------------------------------------------------------|------------------------------------------------------------------------------------------|-----------------------------------------------------------------------------------------|-----------------------------------------------------------------------------------------|
| NHSBT routine                                                                                                                       | INTERVAL - interim Appt                      | INTERVAL - last donation                      | NHSBT routine                                                                         | INTERVAL - 1st Appt                                                                      | INTERVAL interim Appt                                                                   | INTERVAL last Appt                                                                      |
| -4w: Reminder telephone call; either landline (57%) or SMS if mobile number available. SLA to contact 65% (this can be answerphone) |                                              | -3w: automated email reminder                 |                                                                                       | On randomisation: automated email asking donors to contact ISAT to make next appointment | At session: Participants strongly encouraged to make appointment at donation attendance | At session: Participants strongly encouraged to make appointment at donation attendance |
| -7-10d: Appt letter & DHC                                                                                                           | -7-10d: Appt letter & DHC                    | -7-10d: Appt letter & DHC                     |                                                                                       | +14 d No Appt - Step 1: Telephone call & voicemail                                       | -3w No Appt: Automated email to prompt donor to call ISAT                               | -3w No Appt: Automated email to prompt donor to call ISAT                               |
| Week of Appt: SMS (SMS reminders are stock-driven and 100% of donors receiving these email will receive all three reminders)        | -1d: SMS                                     | -1d: SMS                                      | -4w: Sales call (generic voice mail), stock-driven, SLA 65%                           | +21d No Appt - Step 2: Telephone call & voicemail                                        | Day 0: Appointment due date                                                             | -7d No Appt - Step 1: Telephone call & voicemail                                        |
| Day of Appt: SMS                                                                                                                    | Day 0: Date of booked appointment            | Day 0: Date of booked appointment             | -7d Appt letter and DHC                                                               | +28d No Appt - Step 3: Email                                                             |                                                                                         | -6d-1d No Appt - Step 2: Telephone call & voicemail                                     |
| Day of Appt: Email reminder (added 2014)                                                                                            | DNA - Step 1: Telephone call & voicemail     | DNA - Step 1: Telephone call & voicemail      | Day of session: Telephone call & email, followed by SMS (if grid is 90% or less full) | Day 0: Appointment due date                                                              |                                                                                         | -6d-1d No Appt - Step 3: Email                                                          |
|                                                                                                                                     | +7d DNA - Step 2: Telephone call & voicemail | +7d DNA - Step 2: Telephone call & voicemail  |                                                                                       | No Appt - Step 1: Telephone call & voicemail                                             |                                                                                         | Day 0: Appointment due date                                                             |
|                                                                                                                                     | +14d DNA - Step 3: Email                     | +14d DNA - Step 3: Email                      |                                                                                       | +7d No Appt - Step 2: Telephone call & voicemail                                         |                                                                                         | +2w No Appt - Step 1: Telephone call & voicemail                                        |
|                                                                                                                                     |                                              | +28d DNA - Step 1: Telephone call & voicemail |                                                                                       | +14d No Appt - Step 3: Email                                                             |                                                                                         | +3w No Appt - Step 2: Telephone call & voicemail                                        |
|                                                                                                                                     |                                              | +35d DNA - Step 2: Telephone call & voicemail |                                                                                       |                                                                                          |                                                                                         | +4w No Appt - Step 3: Email                                                             |
|                                                                                                                                     |                                              | +42d DNA - Step 3: Email                      |                                                                                       |                                                                                          |                                                                                         |                                                                                         |

**Abbreviations:** Appt Appointment; d day(s); DHC Donor Health Check (questionnaire); DNA did not attend; ISAT INTERVAL Study Administration Team; NHSBT National Health Service Blood and Transplant; SLA service level agreement; SMS short message service (ie, text message); w week(s)
